# Supplementary material for: Non-Grotthuss proton diffusion mechanism in tungsten oxide dihydrate from first-principles calculations
Source: Royal Society of Chemistry journal article supplement (doi:10.1039/c4ta02465f), 2014-06-19
Supplement: c4ta02465f4.pdf [file c4ta02465f4.pdf]

Electronic Supplementary Information for

**Non-Grotthuss proton diffusion mechanism in tungsten  
oxide dihydrate from first-principles calculations**

**Hao Lin, Fei Zhou, Chi-Ping Liu, Vidvuds Ozolins\***

Department of Materials Science and Engineering, University of California, Los Angeles, P.O.  
Box 951595, Los Angeles, California 90095-1595, USA; E-mail: [vidvuds@ucla.edu](mailto:vidvuds@ucla.edu)

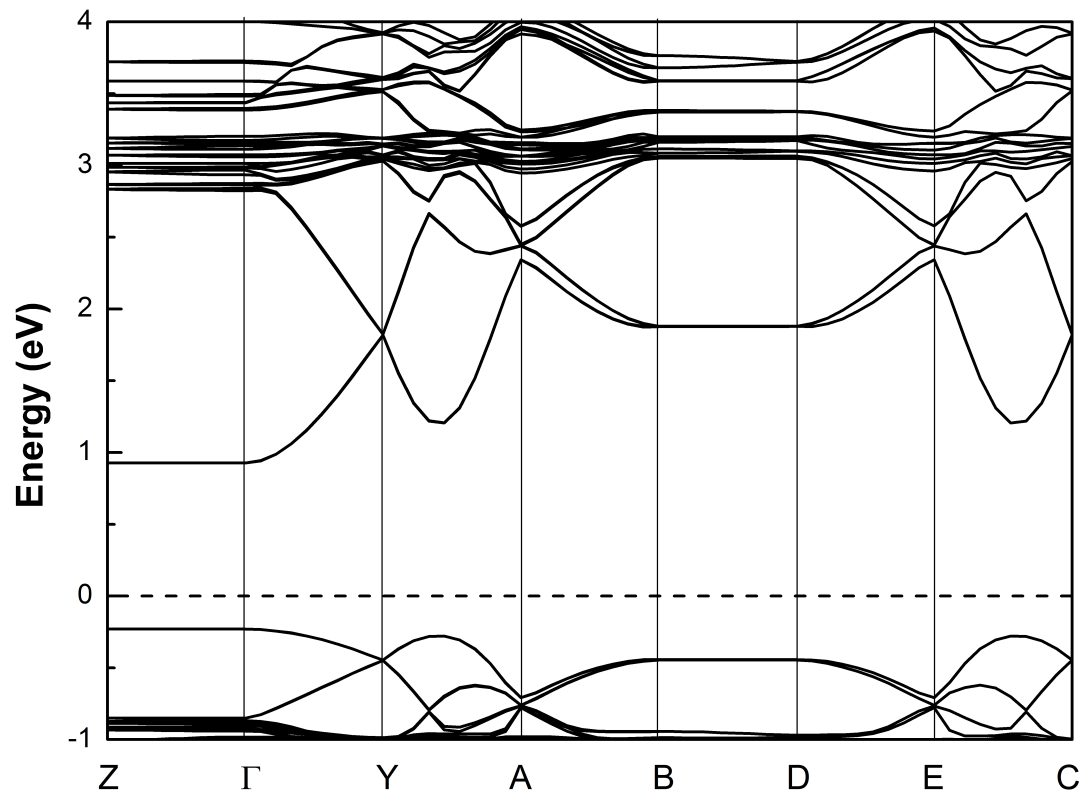

Fig. S1 Band structure of tungsten oxide dihydrate. The high symmetry points in the b direction are plotted in the range from Z (0, 1/2, 0) to  $\Gamma$  (0, 0, 0) and from B (0, 0, 1/2) to D (0, 1/2, 1/2).

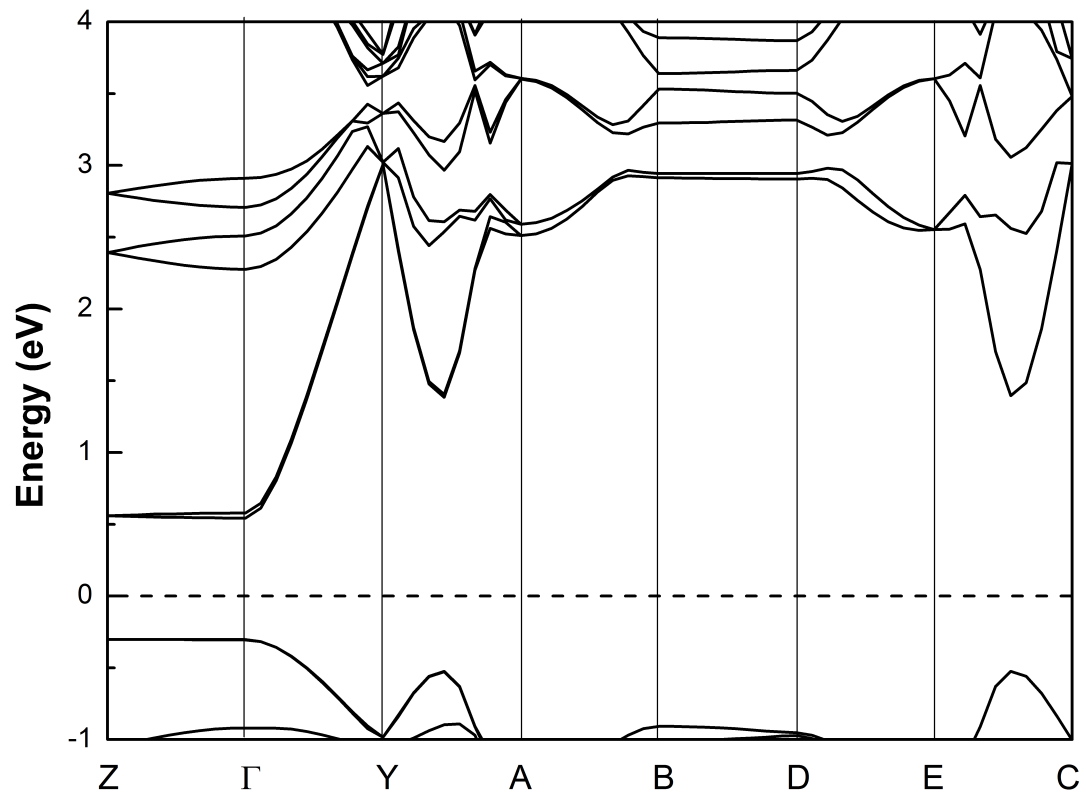

Fig. S2 Band structure of tungsten oxide monohydrate.

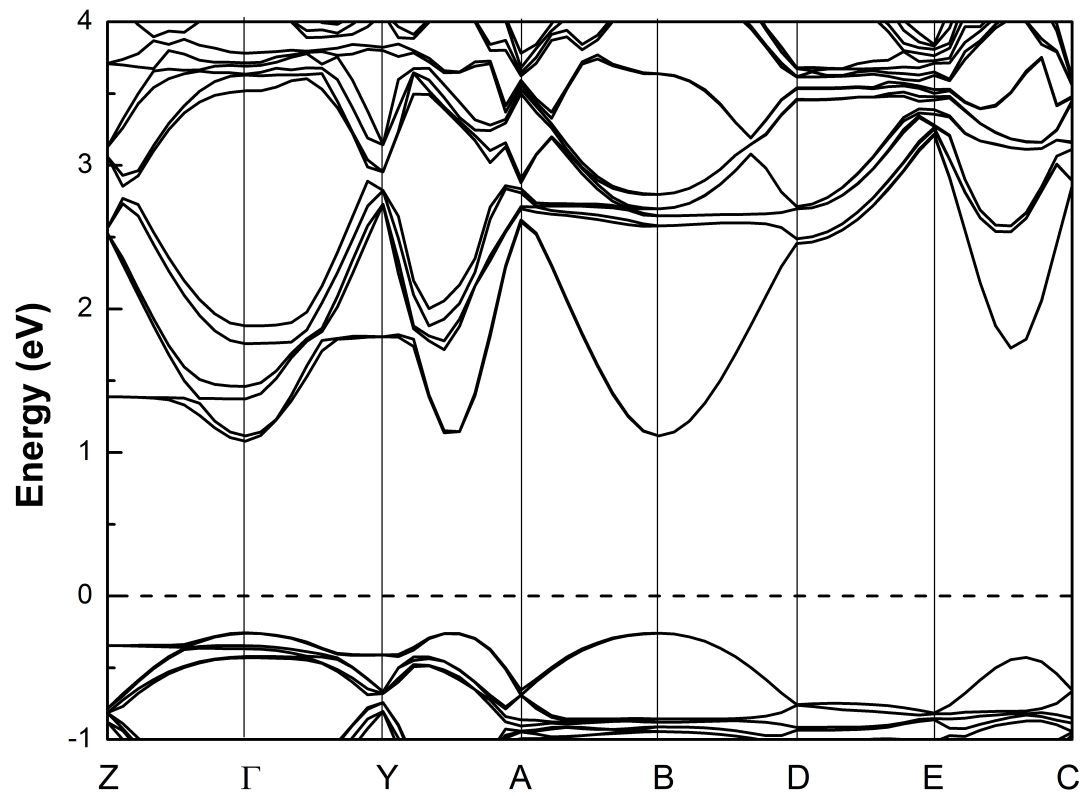

Fig. S3 Band structure of tungsten oxide.

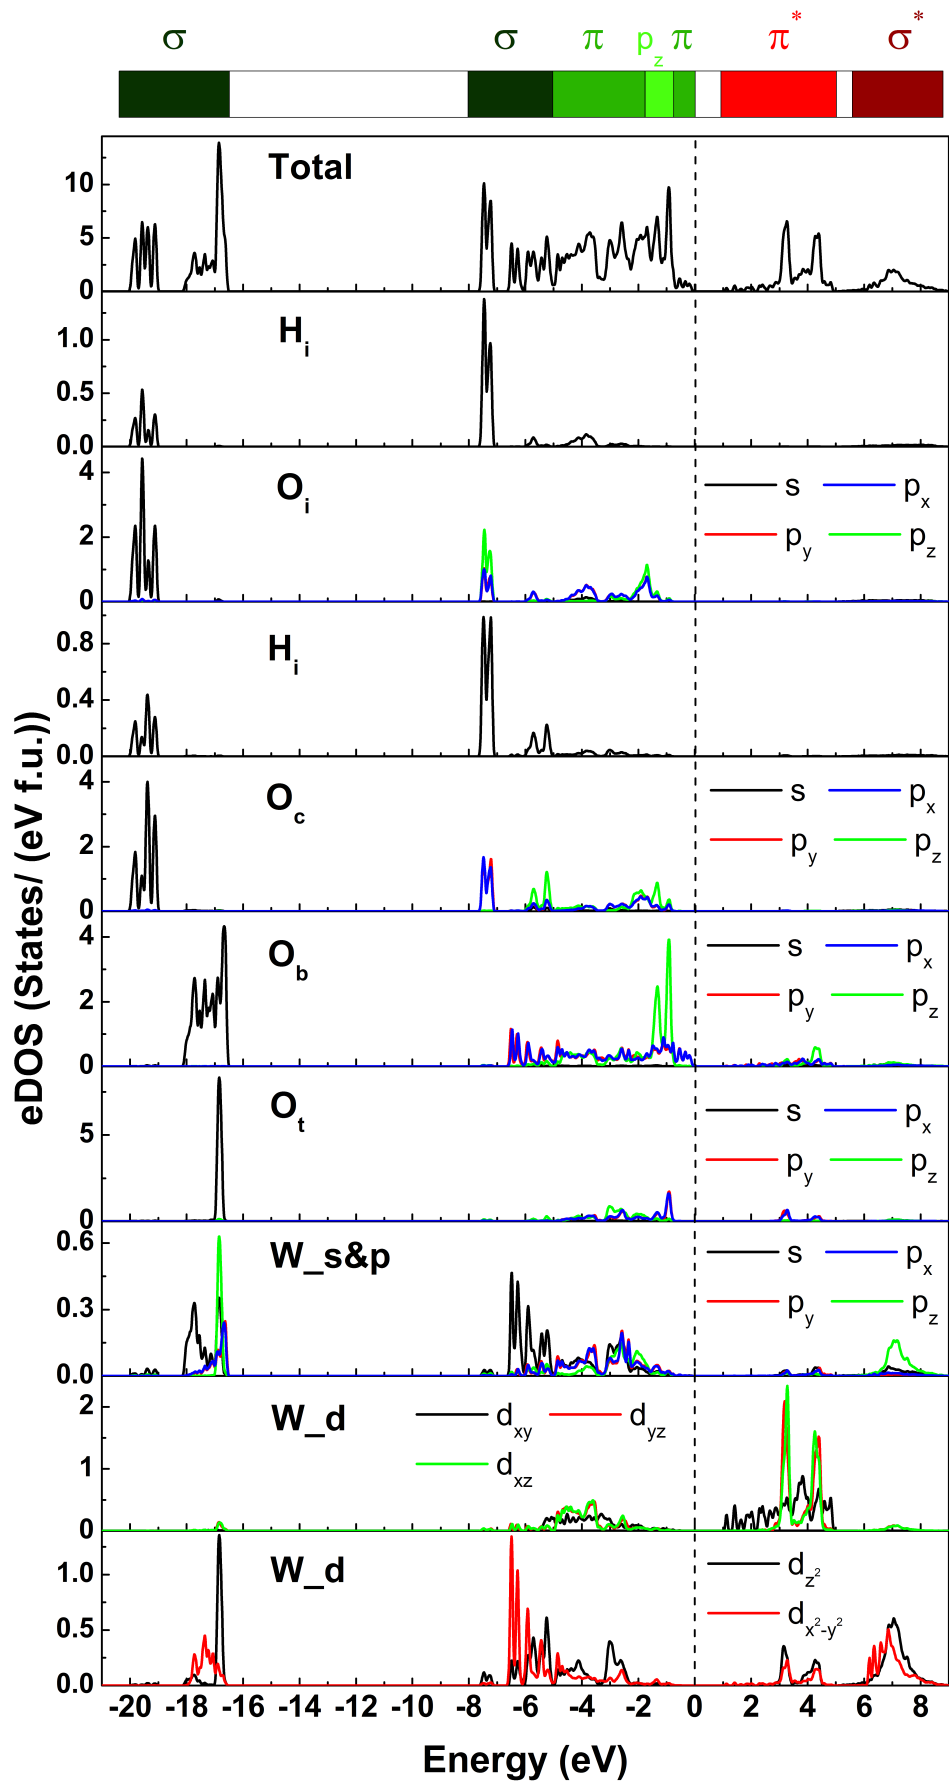

Fig. 4S The atom- and angular momentum-decomposed electronic density of states.

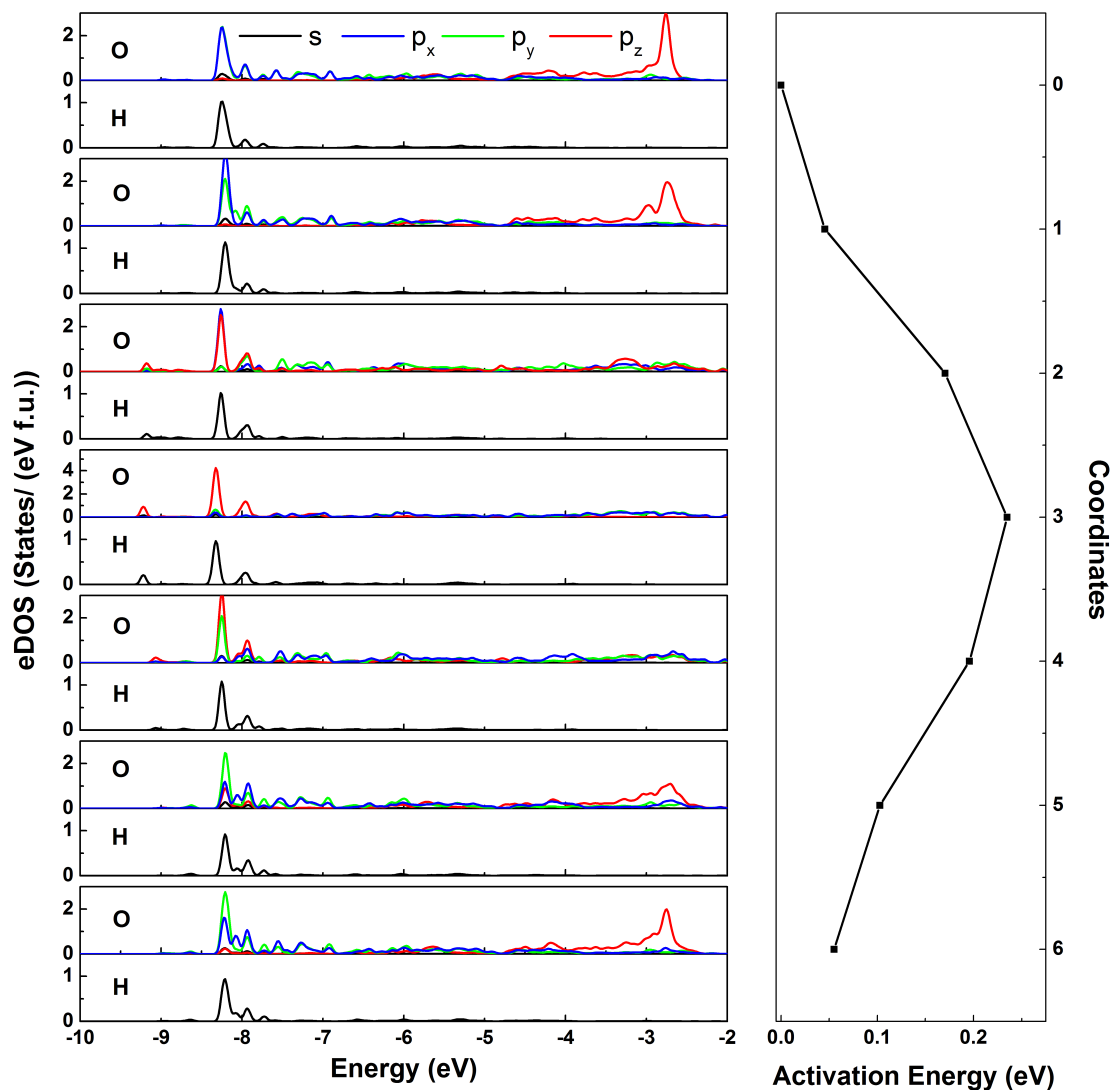

Fig. 5S Atom- and momentum-decomposed eDOS of the O<sub>b</sub>-H dimer during proton rotation. This rotation is facilitated by the fact that the proton remains bonded to one of the bridging oxygen's nonbonding 2*p* orbitals.

Movie S1 NEB images movie corresponding to proton rotation.

Movie S2 NEB images movie corresponding to the supercell calculation.

Movie S3 NEB images movie corresponding to large octahedral distortion.
